# Supplementary material
Source: PubMed Central journal article supplement (PMC4499230)
Supplement: NIHMS703640-supplement-Supplementary_table.pdf [file NIHMS703640-supplement-Supplementary_table.pdf]

**Supplementary Table 1. Hepatocyte gene list used in GSEA for Extended Data Fig. 1g**

|         |               |         |         |        |               |
|---------|---------------|---------|---------|--------|---------------|
| C3      | SELENBP1      | LRG1    | MX2     | XBP1   | ST7L          |
| SULT1A1 | DEDD2         | TMEM42  | LRPAP1  | ELL    | STK40         |
| IIGP1   | RTP4          | RNF167  | CNNM3   | HP     | FURIN         |
| FGB     | TAP2          | IRF7    | ANKRD46 | PCNX   | NRTN          |
| PARP9   | TENC1         | CRY2    | SASH1   | PTCH1  | ADARB1        |
| FGA     | CCPG1         | SDF4    | LMBRD1  | ARL4D  | 2610002M06RIK |
| LIMS2   | CFH           | ZHX1    | NCOA1   | STAT3  | DENND1A       |
| IGTP    | CDC42EP4      | BACH1   | ASPH    | CHCHD7 | 1110031I02RIK |
| HABP2   | SLC18A1       | FRAT1   | APTX    | C87436 | SEC63         |
| GC      | D230025D16RIK | UBR2    | SLC30A1 | TOR2A  | TIAL1         |
| NMI     | DLL1          | ATF5    | FGG     | PLCB1  | LMAN2         |
| BNIP3   | SEMA4A        | ST3GAL1 | LPGAT1  | STK16  | PDIA6         |
| TAPBP   | TTYH2         | DPM1    | XDH     | ELAC1  | ENY2          |
| TLE1    | LRRC61        | MIF4GD  | CYHR1   | PDE4A  | PTPRJ         |
| PARP12  | 2310061J03RIK | TMCO4   | UNC84B  | FGR    | AHCY          |
| DNAJB9  | 2310010J17RIK | PSMB8   | TMEM62  | ABCB9  | FGFR3         |

Gene symbols from a set of 96 genes used to generate ‘Hepatocyte Genes’ GSEA data in **Extended Data Fig. 1g**. This gene set was created from expression data from Shin, et al. 2001<sup>35</sup> as described in Methods.
